# Supplementary material for: Novel cocoon-like Au/La2O3nanomaterials: synthesis and their ultra-enhanced cataluminescence performance to volatile organic compounds
Source: Royal Society of Chemistry journal article supplement (doi:10.1039/c0jm02832k), 2010-11-29
Supplement: c0jm02832k.pdf [file c0jm02832k.pdf]

**Supporting Information for “Novel cocoon-Like Au/La<sub>2</sub>O<sub>3</sub> nanomaterials:  
synthesis and their ultra-enhanced cataluminescence performance to volatile  
organic compounds”**

Zheng Guo,<sup>§</sup> Zhong-Wei Jiang,<sup>§</sup> Xing Chen, Bai Sun, Min-Qiang Li,<sup>\*</sup> Jin-Huai Liu,  
Xing-Jiu Huang<sup>\*</sup>

Research Center for Biomimetic Functional Materials and Sensing Devices, Institute  
of Intelligent Machines, Chinese Academy of Sciences, Hefei 230031, PR China

<sup>§</sup>These two authors contributed equally to this work.

<sup>\*</sup>Correspondence should be addressed to X.-J. Huang and

E-mail: [xingjiuhuang@iim.ac.cn](mailto:xingjiuhuang@iim.ac.cn) (X.J.H); [mqli@iim.ac.cn](mailto:mqli@iim.ac.cn) (M.Q.L)

Tel: +86 551 5595607

Fax: +86 551 5592420

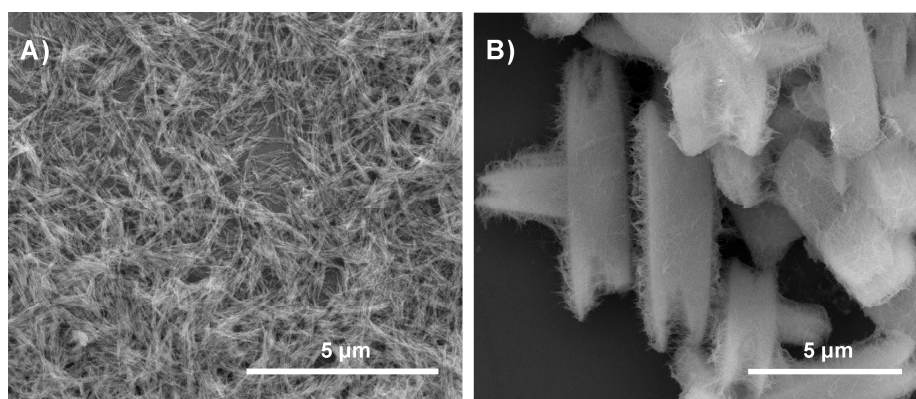

Fig. S1. (A) SEM image of  $\text{La}(\text{OH})_3$  precursors (1.5 mmol of oxalic acid was firstly added, after stirring for about 20 min, 50 mmol of NaOH was added). (B) SEM image of  $\text{La}(\text{OH})_3$  precursors (50 mmol of NaOH was firstly added, after stirring for about 20 min, 1.5 mmol of oxalic acid was added). Lanthanum nitrate: 1 mmol; Reaction temperature: 180 °C; Reaction time: 24 h.

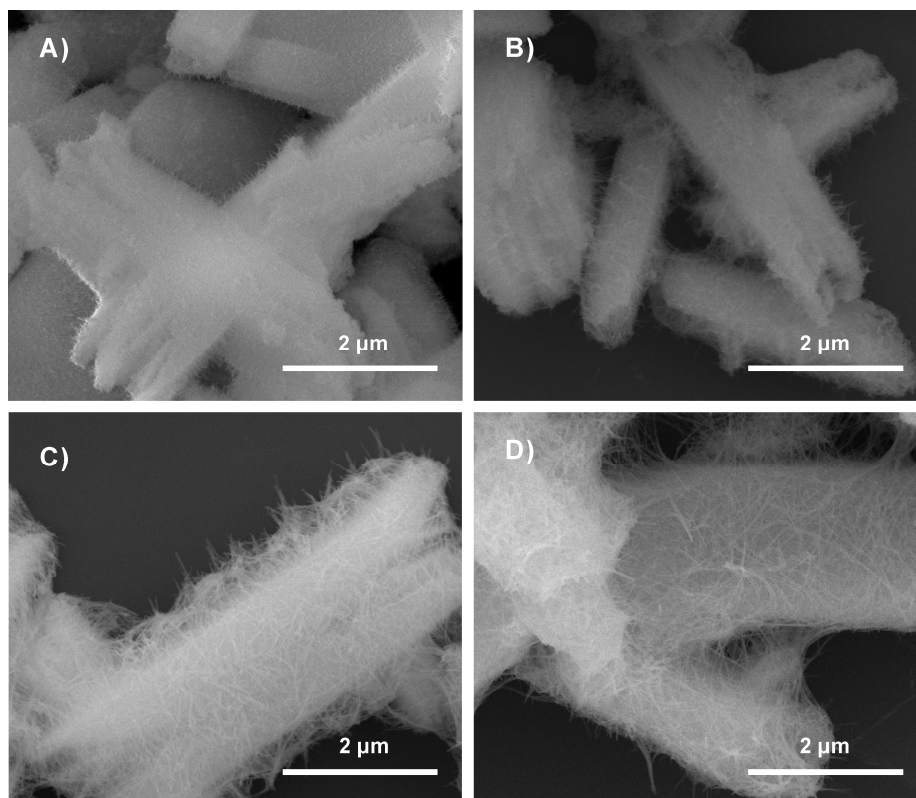

Fig. S2. SEM images of  $\text{La}(\text{OH})_3$  precursors synthesized at different reaction temperature: (A) 140 °C, (B) 160 °C, (C) 180 °C, (D) 200 °C. Lanthanum nitrate: 1 mmol; Oxalic acid: 1.5 mmol; NaOH: 50 mmol; Reaction time: 24 h.

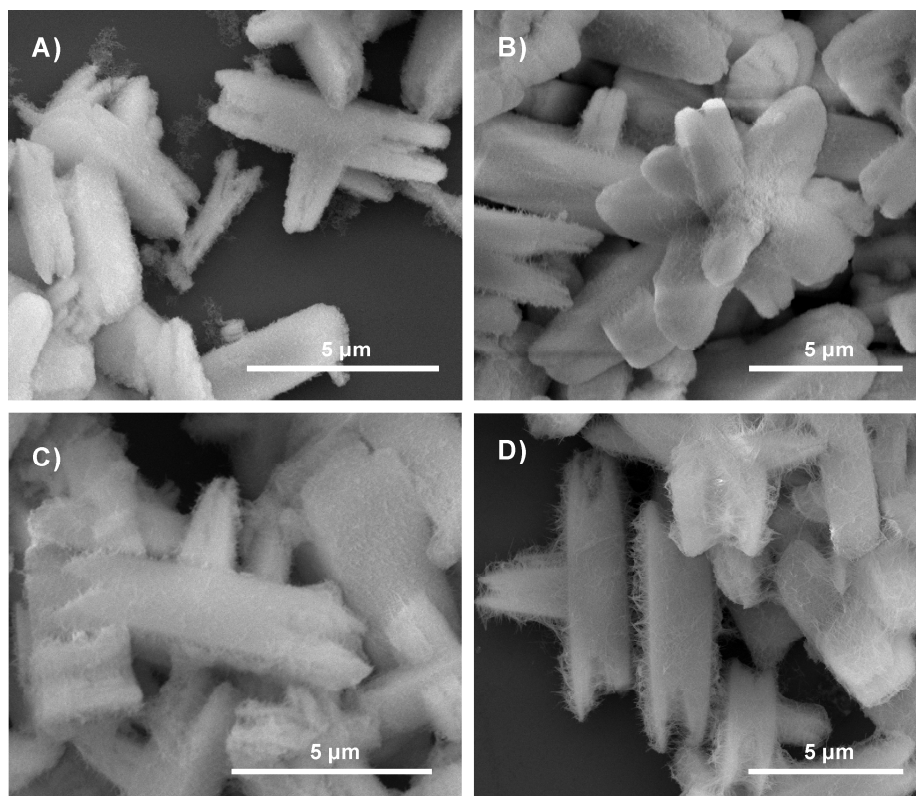

Fig. S3. SEM images of  $\text{La}(\text{OH})_3$  precursors synthesized at different reaction time: (A) 4 h, (B) 9 h, (C) 12 h, (D) 24 h. Lanthanum nitrate: 1 mmol; Oxalic acid: 1.5 mmol; NaOH: 50 mmol; Reaction temperature: 180 °C.



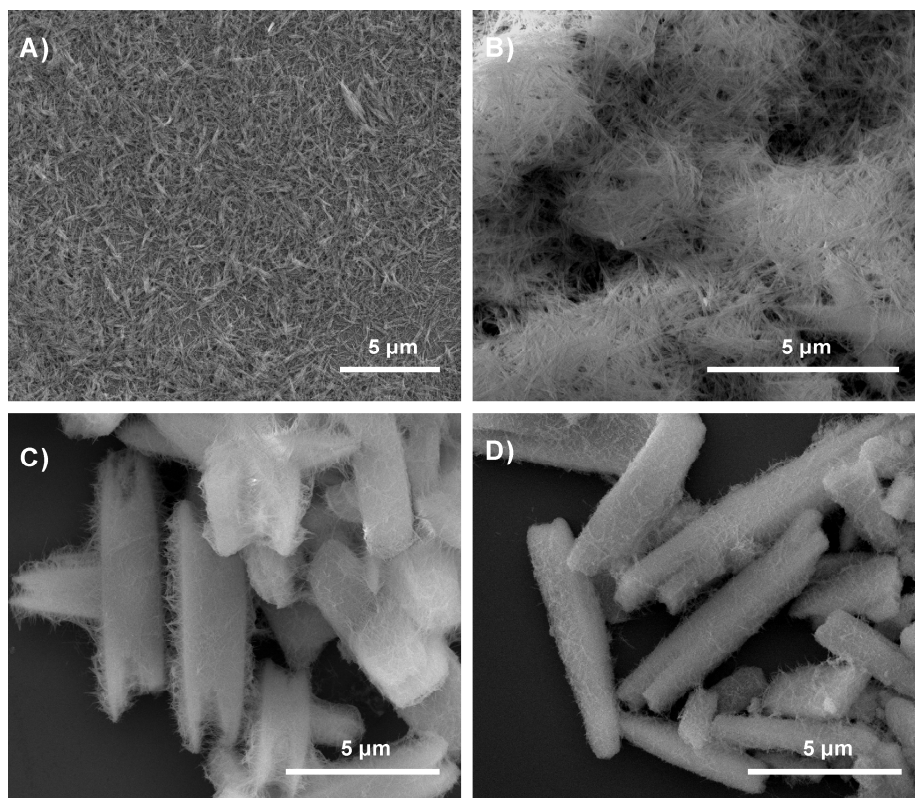

Fig. S4. SEM images of La(OH)<sub>3</sub> precursors synthesized at different concentration of oxalic acid: (A) 0 mmol, (B) 0.5 mmol, (C) 1.5 mmol, (D) 3.0 mmol. Lanthanum nitrate: 1 mmol; NaOH: 50 mmol; Reaction temperature: 180 °C; Reaction time: 24 h.

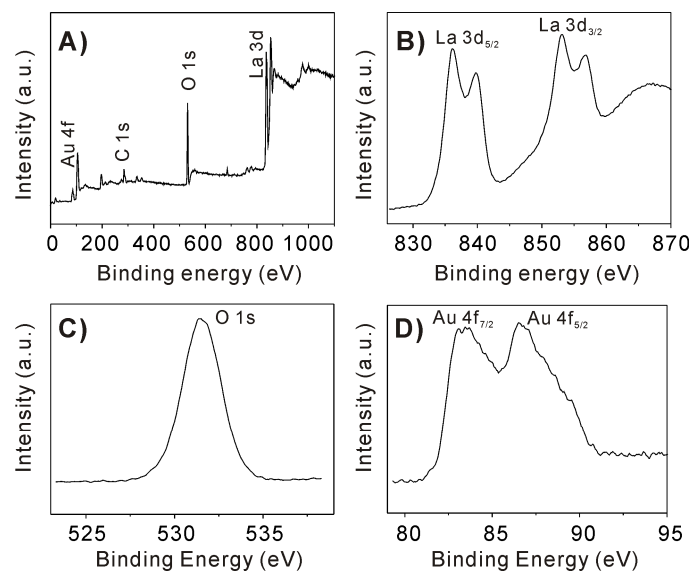

Fig. S5. XPS spectra of the cocoon-like Au/La<sub>2</sub>O<sub>3</sub>. (A) Survey spectrum. (B) La 3d spectrum. (C) O 1s spectrum. (D) Au 4f spectrum.
